# Supplementary material for: A Machine Learning Approach for Identifying Novel Cell Type–Specific Transcriptional Regulators of Myogenesis
Source: PLoS Genet. 2012 Mar 8;8(3):e1002531. doi: 10.1371/journal.pgen.1002531 (PMC3297574; doi:10.1371/journal.pgen.1002531)
Supplement: Table S4 — Motifs identified by the classifier and the mapping of TFBSs in the Ndg, lbl, slou and ap FC enhancers. (XLSX) [file pgen.1002531.s013.xlsx]

## Sheet: Key
Key to the data presented in Supplementary Table 3:
Excel Worksheet Tab	Description
Motifs	Top 50 sequence motifs, corresponding TFs and DNA binding domains
Ndg	Enrichment scores (E-score) of 8-mer matches in the Ndg enhancer (E-score>0.37); for Ets and POUHD, high affinity sites were mutated (2 or more continuous 8-mers had an E-score>0.45); for MYB, all sites were mutated (a string of 8-mers with at least one 8-mers had an E-score>0.4); mutations abrogated binding as measured by E-score (E-score<0.37)
ap	Enrichment scores (E-score) of 8-mer matches in the ap enhancer for vertebrate Fkh TFs (E-score>0.37); Fkh sites were defined as being composed of a string of 3 or more continuous 8-mers of 2 different Fkh TFs with an E-score>0.37; mutations abrogated binding as measure by E-score (E-score<0.37)
Slou	Enrichment scores (E-score) of 8-mer matches to the vertebrate T-box TF Eomes in the Slou enhancer, regions were called a binding site if 2 or more 8-mers had an E-score>0.45; mutations abrogated binding as measured by E-score (E-score<0.37)
Lbl	Enrichment scores (E-score) of 8-mer matches to the vertebrate T-box TF Eomes in the Lbl SBM enhancer, regions were called a binding site if 2 or more 8-mers had an E-score>0.45; mutations abrogated binding as measured by E-score (E-score<0.37); Two separate constructs were designed mutagenizing T-box1-6 and another which mutated T-box1-3 and both gave similar results

## Sheet: Motifs
MOTIF	TF	TF DOMAIN
V$TAL1BETAITF2_01	TAL1, TCR4	bHLH
V$E47_01	TCF3	bHLH
V$MYOD_01	MYOD1	bHLH
V$E2A_Q6	MYOG, MYOD1, MY5, MYF6	bHLH
V$MYB_Q6	MYB	Myb
V$TAL1BETAE47_01	TAL1, TCF3	bHLH
V$ETS_Q6	ETS2	Ets
V$PU1_01	SPI1	Ets
F$GCR1_01	UNKNOWN	bZIP
F$GCR1_B	GCR!	bZIP
V$ETS_Q4	ETS1	Ets
F$FOXO4_01	FOXO4	Fkh
V$TFIIA_Q6	GTF2A1	Probably a co-factor and doesn’t bind DNA directly
V$MAF_Q6_01	MAF	bZIP
V$CHOP_01	DDIT3	bZIP
P$ID1_01	id1	Probably a co-factor and doesn’t bind DNA directly
V$FOXO3_01	FOXO3	Fkh
V$FOXO1_Q5	FOXO1	Fkh
V$CACD_01	CACD	ZNF
V$IRF_Q6_01	TRIM63	ZNF
V$ZNF515_01	GLIS3	ZNF
V$STAT5A_03	STAT5A	Stat
V$STAT1_02	STAT1	Stat
V$LEF1_Q2_01	LEF1, TCF1	HMG
V$OCT1_01	POU2F1	POUHD
V$POU1F1_Q6	POU1F1	POUHD
V$IFP_03	PDX1	HD
V$PXR_Q2	NR1H4	NucR
I$KR_Q6	KR	ZN
V$PAX4_02	PAX4	HD (Prd group)
I$BYN_Q6	BYN	T-box
V$P300_01	Ep300	Probably a co-factor and doesn’t bind DNA directly
V$NGFIC_01	EGR4	ZNF
V$NRSF_01	REST	ZNF
V$OCT4_02	POU5F1	POUHD
V$FREAC2_01	FOXF2	Fkh
V$TCF4_Q5	TCF4	bHLH
V$GATA2_01	GATA2	GATA
V$AR_Q2	AR	NucR
V$GATA4_Q3	GATA4	GATA
V$CRX_Q4	CRX	HD (Prd group)
I$ABDA_Q6	ABD-A	HD (Antp group)
V$PR_02	PGR	ZNF
V$AP3_Q6	unknown	unknown
V$CEBPB_01	CEBPB	bZIP
V$CDX_Q5	CDX2	HD (AbdB group)
V$TBX5_01	TBX5	T-box
V$HIC1_03	HIC1	ZNF
V$POU6F1_01	POU6F1	POUHD
I$TCF_1	pan	HMG

## Sheet: Ndg
TF	k-mer	location	E-score	Site Call	Mutation	Mutant E-score
Ets1	CTGCCGGA	114	0.4181
Ets1	TGCCGGAA	115	0.47154
Ets1	CCGGAATT	117	0.41908
Ets1	GTGTTTCC	137	0.4108
myb	ATGAACGG	153	0.351438	MYB1	ATGAAaGa	0.351438
myb	TGAACGGA	154	0.373585	MYB1	TGAAaGaA	0.0691811
Ets1	GAACGGAA	155	0.45967
myb	GAACGGAA	155	0.356813	MYB1	GAAaGaAA	0.0357498
myb	AACGGAAT	156	0.436114	MYB1	AAaGaAAT	-0.0689627
POU1F1	GATTTATG	187	0.38093	POUHD1	GATTTAca	0.24406
POU1F1	ATTTATGC	188	0.46357	POUHD1	ATTTAcag	0.19623
POU1F1	TTTATGCA	189	0.47172	POUHD1	TTTAcagA	0.08897
POU1F1	TTATGCAA	190	0.4649	POUHD1	TAcagAAC	-0.09018
myb	TGCAACGG	193	0.452917	MYB2	TGCAcaGa	-0.31457
myb	GCAACGGC	194	0.430336	MYB2	GCAcaGaC	-0.149045
myb	CAACGGCC	195	0.460378	MYB2	CAcaGaCC	-0.323111
myb	AACGGCCT	196	0.432835	MYB2	AcaGaCCT	-0.0280661
Ets1	TCGGAAAC	228	0.41523
Ets1	CGGAAACA	229	0.47254
Ets1	GGAAACAC	230	0.4108
Ets1	TTCCGGGT	249	0.46172
POU1F1	TTTATTCA	259	0.42122
POU1F1	AGCTAATT	294	0.46377
POU1F1	GCTAATTT	295	0.41753
POU1F1	CTAATTTT	296	0.40861
POU1F1	TAATTTTA	297	0.41927
myb	GATCGTTA	309	0.417425
Ets1	TAGGCGGA	315	0.35773	ETS1	TAGGCatA	-0.16146
Ets1	AGGCGGAT	316	0.38958	ETS1	AGGCatAT	0.03969
Ets1	GGCGGATG	317	0.47433	ETS1	GGCatATG	-0.1875
Ets1	GCGGATGT	318	0.48444	ETS1	GCatATGT	-0.19103
Ets1	CGGATGTC	319	0.48271	ETS1	CatATGTC	-0.19923
Ets1	GGATGTCG	320	0.41592	ETS1	atATGTCG	0.01293
POU1F1	CTCAATTA	336	0.43947
POU1F1	TCAATTAG	337	0.41247
POU1F1	AATTAGGA	339	0.37863
POU1F1	CACTTAAT	362	0.40215
POU1F1	ACTTAATA	363	0.39368
POU1F1	CTTAATAT	364	0.38039
POU1F1	TTAATATG	365	0.4435	POUHD2	TTAATATc	0.3689
POU1F1	TAATATGC	366	0.4455	POUHD2	TAATATct	0.31077
POU1F1	AATATGCA	367	0.44574	POUHD2	AATATctc	0.19662
POU1F1	ATATGCAT	368	0.46523	POUHD2	ATATctcT	0.11761
POU1F1	TATGCATC	369	0.3601	POUHD2	TATctcTC	0.13845
Ets1	CCACATCC	382	0.43475
Ets1	CACATCCT	383	0.44795
Ets1	ACATCCTT	384	0.42024
POU1F1	TCGTTAAT	412	0.40596
myb	TCGTTAAT	412	0.411798
POU1F1	CGTTAATG	413	0.4166
Ets1	TTGTTTCC	434	0.38025	ETS2	TTGTTTta	0.04002
Ets1	TGTTTCCG	435	0.47254	ETS2	TGTTTtaG	-0.05924
Ets1	GTTTCCGC	436	0.47062	ETS2	GTTTtaGC	0.01436
Ets1	TTTCCGCC	437	0.46867	ETS2	TTTtaGCC	0.05961
Ets1	TTCCGCCA	438	0.43577	ETS2	TTtaGCCA	0.01055
POU1F1	TTAAGTGG	465	0.32348
myb	GCCCGTTA	472	0.441735	MYB3	GCagaTTA	-0.116763
myb	CCGTTAGC	474	0.453129	MYB3	agaTTAGC	-0.189812
myb	CGTTAGCA	475	0.382865	MYB3	gaTTAGCA	-0.166451
Ets1	GTATTTCC	524	0.44139

## Sheet: ap
TF	k-mer	location	E-score	Site Call	Mutation	Mutant E-score
Foxj3	CAACATCA	30	0.40588
Foxk1	CAACATCA	30	0.427756
Foxa2	AACATCAA	31	0.401659
Foxj1	AACATCAA	31	0.432243
Foxj3	AACATCAA	31	0.425563
Foxk1	AACATCAA	31	0.403143
Foxl1	AACATCAA	31	0.393699
Foxj3	TCAAAATA	71	0.387166	Fkh1	TCgAAATA	0.0261262
Foxk1	TCAAAATA	71	0.425222	Fkh1	TCgAAATA	0.0896625
Foxl1	TCAAAATA	71	0.447078	Fkh1	TCgAAATA	0.0959432
Foxj3	CAAAATAA	72	0.438599	Fkh1	CgAAATAA	0.0910419
Foxk1	CAAAATAA	72	0.448336	Fkh1	CgAAATAA	0.143664
Foxl1	CAAAATAA	72	0.457365	Fkh1	CgAAATAA	0.0504192
Foxj3	AAAATAAT	73	0.393174	Fkh1	gAAATAAT	0.27539
Foxk1	AAAATAAT	73	0.373115	Fkh1	gAAATAAT	0.223334
Foxl1	AAAATAAT	73	0.43799	Fkh1	gAAATAAT	0.23651
Foxa2	AAATAATT	74	0.39172	Fkh1	AAATAATT	0.39172
Foxa2	ATATAAAC	112	0.438483	Fkh2	cTATAAAg	0.142494
Foxj1	ATATAAAC	112	0.379887	Fkh2	cTATAAAg	0.0195618
Foxj3	ATATAAAC	112	0.430225	Fkh2	cTATAAAg	0.139894
Foxk1	ATATAAAC	112	0.454271	Fkh2	cTATAAAg	0.0923644
Foxl1	ATATAAAC	112	0.462722	Fkh2	cTATAAAg	0.145795
Foxa2	TATAAACA	113	0.475917	Fkh2	TATAAAgA	0.171524
Foxj1	TATAAACA	113	0.472053	Fkh2	TATAAAgA	-0.0686537
Foxj3	TATAAACA	113	0.489756	Fkh2	TATAAAgA	-0.162478
Foxk1	TATAAACA	113	0.4909	Fkh2	TATAAAgA	-0.0082653
Foxl1	TATAAACA	113	0.495163	Fkh2	TATAAAgA	-0.11628
Foxa2	ATAAACAG	114	0.457285	Fkh2	ATAAAgAG	0.223352
Foxj1	ATAAACAG	114	0.413257	Fkh2	ATAAAgAG	0.130571
Foxj3	ATAAACAG	114	0.477319	Fkh2	ATAAAgAG	-0.0075611
Foxk1	ATAAACAG	114	0.478208	Fkh2	ATAAAgAG	0.0177808
Foxl1	ATAAACAG	114	0.486651	Fkh2	ATAAAgAG	0.150326
Foxa2	TAAACAGA	115	0.466132	Fkh2	TAAAgAGA	0.184721
Foxj1	TAAACAGA	115	0.449399	Fkh2	TAAAgAGA	0.0517228
Foxj3	TAAACAGA	115	0.475711	Fkh2	TAAAgAGA	0.0214732
Foxk1	TAAACAGA	115	0.45185	Fkh2	TAAAgAGA	0.0252132
Foxl1	TAAACAGA	115	0.47794	Fkh2	TAAAgAGA	0.107986
Foxa2	AAACAGAA	116	0.38442	Fkh2	AAAgAGAA	0.118951
Foxj1	AAACAGAA	116	0.378489	Fkh2	AAAgAGAA	0.115805
Foxj3	AAACAGAA	116	0.396795	Fkh2	AAAgAGAA	0.00883603
Foxl1	AAACAGAA	116	0.395721	Fkh2	AAAgAGAA	-0.0848645
Foxa2	ATTTGTGT	246	0.402963	Fkh3	ATTcGTGc	-0.064294
Foxj1	ATTTGTGT	246	0.381828	Fkh3	ATTcGTGc	-0.104866
Foxk1	ATTTGTGT	246	0.35821	Fkh3	ATTcGTGc	-0.0309577
Foxa2	TTTGTGTT	247	0.381907	Fkh3	TTcGTGcT	0.0208118
Foxj1	TTTGTGTT	247	0.453025	Fkh3	TTcGTGcT	-0.0253032
Foxj3	TTTGTGTT	247	0.434167	Fkh3	TTcGTGcT	-0.0514562
Foxk1	TTTGTGTT	247	0.425084	Fkh3	TTcGTGcT	0.0705105
Foxa2	TTGTGTTT	248	0.441494	Fkh3	TcGTGcTT	-0.0142133
Foxj1	TTGTGTTT	248	0.468912	Fkh3	TcGTGcTT	-0.0112252
Foxj3	TTGTGTTT	248	0.469037	Fkh3	TcGTGcTT	-0.00538952
Foxk1	TTGTGTTT	248	0.463792	Fkh3	TcGTGcTT	0.158067
Foxl1	TTGTGTTT	248	0.427721	Fkh3	TcGTGcTT	-0.0872944
Foxj1	TGTGTTTT	249	0.440782	Fkh3	cGTGcTTT	-0.0143956
Foxj3	TGTGTTTT	249	0.453263	Fkh3	cGTGcTTT	-0.0955619
Foxk1	TGTGTTTT	249	0.436946	Fkh3	cGTGcTTT	0.0114512
Foxl1	TGTGTTTT	249	0.325388	Fkh3	cGTGcTTT	-0.0737661
Foxj1	GTGTTTTC	250	0.397644	Fkh3	GTGcTTTC	-0.0220867
Foxj3	GTGTTTTC	250	0.444723	Fkh3	GTGcTTTC	-0.0603281
Foxk1	GTGTTTTC	250	0.436616	Fkh3	GTGcTTTC	0.0302425
Foxj1	TGTTTTCA	251	0.417537	Fkh3	TGcTTTCA	0.161687
Foxj3	TGTTTTCA	251	0.446442	Fkh3	TGcTTTCA	0.0237813
Foxk1	TGTTTTCA	251	0.457675	Fkh3	TGcTTTCA	0.174274
Foxl1	TGTTTTCA	251	0.459856	Fkh3	TGcTTTCA	0.160345
Foxa2	ATTTTGTT	258	0.381817	Fkh4	gTTTTcTT	0.218855
Foxj1	ATTTTGTT	258	0.43266	Fkh4	gTTTTcTT	0.263815
Foxj3	ATTTTGTT	258	0.434605	Fkh4	gTTTTcTT	0.231712
Foxk1	ATTTTGTT	258	0.403939	Fkh4	gTTTTcTT	0.236039
Foxa2	TTTTGTTG	259	0.391526	Fkh4	TTTTcTTG	0.163267
Foxj1	TTTTGTTG	259	0.482036	Fkh4	TTTTcTTG	0.0841834
Foxj3	TTTTGTTG	259	0.454961	Fkh4	TTTTcTTG	0.157219
Foxk1	TTTTGTTG	259	0.437367	Fkh4	TTTTcTTG	0.149026
Foxl1	TTTTGTTG	259	0.44905	Fkh4	TTTTcTTG	0.152295
Foxa2	TTTGTTGA	260	0.478219	Fkh4	TTTcTTGA	0.176489
Foxj1	TTTGTTGA	260	0.488613	Fkh4	TTTcTTGA	0.203838
Foxj3	TTTGTTGA	260	0.48089	Fkh4	TTTcTTGA	0.142687
Foxk1	TTTGTTGA	260	0.479568	Fkh4	TTTcTTGA	0.185705
Foxl1	TTTGTTGA	260	0.480285	Fkh4	TTTcTTGA	0.172732
Foxa2	TTGTTGAA	261	0.370531	Fkh4	TTcTTGAA	0.0825613
Foxl1	TTGTTGAA	261	0.432901	Fkh4	TTcTTGAA	0.0298551
Foxl1	TGTTGAAA	262	0.398751	Fkh4	TcTTGAAA	0.095373
Foxa2	ATTATTTG	270	0.467405
Foxj3	ATTATTTG	270	0.413131
Foxl1	ATTATTTG	270	0.379645
Foxa2	TTATTTGG	271	0.439079
Foxj3	TTATTTGG	271	0.424563
Foxl1	TTATTTGG	271	0.392828
Foxa2	AATGTGTA	393	0.42984	Fkh5	AATcTGcA	-0.0623274
Foxj1	AATGTGTA	393	0.371945	Fkh5	AATcTGcA	0.061108
Foxa2	ATGTGTAT	394	0.384281	Fkh5	ATcTGcAT	-0.0770068
Foxj1	ATGTGTAT	394	0.394329	Fkh5	ATcTGcAT	0.0862615
Foxj3	ATGTGTAT	394	0.390019	Fkh5	ATcTGcAT	-0.00613718
Foxa2	TGTGTATG	395	0.382552	Fkh5	TcTGcATG	-0.319523
Foxj1	TGTGTATG	395	0.420592	Fkh5	TcTGcATG	-0.0130174
Foxj3	TGTGTATG	395	0.409398	Fkh5	TcTGcATG	-0.188804
Foxk1	TGTGTATG	395	0.377667	Fkh5	TcTGcATG	-0.313455
Foxa2	GTGTATGT	396	0.381723	Fkh5	cTGcATGT	-0.0407272
Foxa2	TGTATGTA	397	0.399141	Fkh5	TGcATGTA	0.0465247
Foxa2	GTATGTAC	398	0.396002	Fkh5	GcATGTAC	-0.103233
Foxa2	TATGTACC	399	0.382279	Fkh5	GcATGTAC	-0.103233
Foxa2	CATAAATA	434	0.423371	Fkh6	CAgAAAgA	-0.0674647
Foxj3	CATAAATA	434	0.455719	Fkh6	CAgAAAgA	0.141117
Foxk1	CATAAATA	434	0.446363	Fkh6	CAgAAAgA	0.160201
Foxl1	CATAAATA	434	0.473549	Fkh6	CAgAAAgA	0.169882
Foxa2	ATAAATAA	435	0.470073	Fkh6	AgAAAgAA	-0.0111458
Foxj1	ATAAATAA	435	0.378007	Fkh6	AgAAAgAA	0.0318493
Foxj3	ATAAATAA	435	0.474771	Fkh6	AgAAAgAA	0.114818
Foxk1	ATAAATAA	435	0.468727	Fkh6	AgAAAgAA	0.185576
Foxl1	ATAAATAA	435	0.486582	Fkh6	AgAAAgAA	0.171957
Foxa2	TAAATAAT	436	0.465505	Fkh6	gAAAgAAT	0.0257215
Foxj3	TAAATAAT	436	0.449644	Fkh6	gAAAgAAT	0.0209573
Foxk1	TAAATAAT	436	0.432214	Fkh6	gAAAgAAT	0.146967
Foxl1	TAAATAAT	436	0.482427	Fkh6	gAAAgAAT	0.0534507
Foxa2	AAATAATA	437	0.448595	Fkh6	AAAgAATA	0.116584
Foxj3	AAATAATA	437	0.433506	Fkh6	AAAgAATA	-0.115559
Foxk1	AAATAATA	437	0.412965	Fkh6	AAAgAATA	0.173007
Foxl1	AAATAATA	437	0.446255	Fkh6	AAAgAATA	-0.105834
Foxa2	AATAATAT	438	0.419876	Fkh6	AAgAATAT	0.201137
Foxj3	AATAATAT	438	0.382287	Fkh6	AAgAATAT	0.0193954
Foxk1	AATAATAT	438	0.415482	Fkh6	AAgAATAT	0.099737
Foxl1	AATAATAT	438	0.422185	Fkh6	AAgAATAT	0.0986399
Foxa2	ATAATATT	439	0.416415	Fkh6	AgAATATT	0.204526
Foxj3	ATAATATT	439	0.363224	Fkh6	AgAATATT	0.150862
Foxk1	ATAATATT	439	0.382943	Fkh6	AgAATATT	0.219023
Foxl1	ATAATATT	439	0.393286	Fkh6	AgAATATT	0.219023
Foxa2	ATTAAACA	444	0.454877	Fkh7	cTTAAAgA	0.00987582
Foxj1	ATTAAACA	444	0.400346	Fkh7	cTTAAAgA	0.038037
Foxj3	ATTAAACA	444	0.386079	Fkh7	cTTAAAgA	-0.14081
Foxl1	ATTAAACA	444	0.460359	Fkh7	cTTAAAgA	-0.0990873
Foxa2	TTAAACAT	445	0.446196	Fkh7	TTAAAgAT	0.126243
Foxj1	TTAAACAT	445	0.42277	Fkh7	TTAAAgAT	0.00535946
Foxj3	TTAAACAT	445	0.402167	Fkh7	TTAAAgAT	-0.127312
Foxl1	TTAAACAT	445	0.461343	Fkh7	TTAAAgAT	0.198745
Foxa2	TAAACATG	446	0.460732	Fkh7	TAAAgATG	0.106877
Foxj1	TAAACATG	446	0.391104	Fkh7	TAAAgATG	0.0665605
Foxj3	TAAACATG	446	0.418872	Fkh7	TAAAgATG	0.0120374
Foxk1	TAAACATG	446	0.446445	Fkh7	TAAAgATG	0.0616049
Foxl1	TAAACATG	446	0.483007	Fkh7	TAAAgATG	0.0298584
Foxj1	AAACATGT	447	0.401692	Fkh7	AAAgATGT	0.110034
Foxj3	AAACATGT	447	0.381192	Fkh7	AAAgATGT	0.12753
Foxk1	AAACATGT	447	0.375277	Fkh7	AAAgATGT	0.242472
Foxj1	AACATGTA	448	0.390284	Fkh7	AAAgATGT	0.110034
Foxa2	TGTATGTA	452	0.399141
Foxa2	ACATACAC	543	0.381723
Foxa2	AATATATG	659	0.384082
Foxa2	ATTTTGTT	667	0.381817
Foxj1	ATTTTGTT	667	0.43266
Foxj3	ATTTTGTT	667	0.434605
Foxk1	ATTTTGTT	667	0.403939

## Sheet: Slou
TF	k-mer	location	E-score	Site Call	Mutation	Mutant E-score
Eomes	CAACACTT	273	0.413182
Eomes	AACACTTT	274	0.427794
Eomes	ACACTTTG	275	0.365949
Eomes	TTTTAACA	399	0.411919	Tbox1	TTTTAAgA	0.0821685
Eomes	TTTAACAC	400	0.467181	Tbox1	TTTAAgAC	-0.0594385
Eomes	TTAACACT	401	0.464482	Tbox1	TTAAgACT	-0.0652223
Eomes	TAACACTT	402	0.474793	Tbox1	TAAgACTT	-0.0425105
Eomes	AACACTTT	403	0.427794	Tbox1	AAgACTTT	-0.113272
Eomes	ACACTTTC	404	0.434512	Tbox1	AgACTTTC	-0.0278488
Eomes	AAATGTGT	939	0.438508
Eomes	ATGTGTTG	941	0.429351
Eomes	AAAGGTGT	1053	0.479777	Tbox2	AAAGGTcT	-0.263542
Eomes	AAGGTGTG	1054	0.477897	Tbox2	AAGGTcTG	-0.0833336
Eomes	AGGTGTGA	1055	0.494097	Tbox2	AGGTcTGA	-0.191069
Eomes	GGTGTGAA	1056	0.496395	Tbox2	GGTcTGAA	-0.163638
Eomes	GTGTGAAG	1057	0.482608	Tbox2	GTcTGAAG	-0.136673
Eomes	TGTGAAGA	1058	0.414839	Tbox2	TcTGAAGA	0.0168098

## Sheet: Lbl
TF	k-mer	location	E-score	Site Call	Mutation	Mutant E-score
Eomes	ACGTGTCA	85	0.469222	Tbox1	ACGTcTCA	0.0429078
Eomes	GTGTCATA	87	0.441059	Tbox1	GTcTCATA	0.0255957
Eomes	ACTTCACA	291	0.428584	Tbox2	ACTTCAgA	-0.209617
Eomes	CTTCACAC	292	0.482608	Tbox2	CTTCAgAC	-0.136673
Eomes	TTCACACT	293	0.485384	Tbox2	TTCAgACT	-0.168351
Eomes	TCACACTT	294	0.484566	Tbox2	TCAgACTT	-0.024524
Eomes	CACACTTT	295	0.423327	Tbox2	CAgACTTT	-0.126963
Eomes	GAAGGTGT	356	0.466339	Tbox3	GAAGGTcT	-0.256912
Eomes	AAGGTGTT	357	0.484458	Tbox3	AAGGTcTT	-0.292555
Eomes	AGGTGTTA	358	0.495528	Tbox3	AGGTcTTA	-0.0270729
Eomes	GGTGTTAA	359	0.487829	Tbox3	GGTcTTAA	0.104352
Eomes	GTGTTAAA	360	0.467181	Tbox3	GTcTTAAA	-0.0594385
Eomes	ATAACACC	588	0.479869	Tbox4
Eomes	TAACACCA	589	0.454731	Tbox4
Eomes	AACACCAA	590	0.382276	Tbox4
Eomes	AGGCGTGA	742	0.475448	Tbox5
Eomes	GGCGTGAA	743	0.467597	Tbox5
Eomes	GCGTGAAA	744	0.472145	Tbox5
Eomes	TCACAGGT	845	0.411688	Tbox6
