# Supplementary material for: A Machine Learning Approach for Identifying Novel Cell Type–Specific Transcriptional Regulators of Myogenesis
Source: PLoS Genet. 2012 Mar 8;8(3):e1002531. doi: 10.1371/journal.pgen.1002531 (PMC3297574; doi:10.1371/journal.pgen.1002531)
Supplement: Table S5 — Summary of in situ hybridization analysis of T-box and POUHD family members. (XLSX) [file pgen.1002531.s014.xlsx]

## Sheet: Key
Key to the data presented in Supplementary Table 4:
Excel Worksheet Tab	Description
T-box	In situ hybridization analysis of every known Drosophila T-box TF
POUHD	In situ hybridization analysis of every known Drosophila POU homeodomain (POUHD) TF

## Sheet: T-box
Gene	Name	ISH Results
CG6634	mid	ectodermal stripes; midline; CNS; not in cardiac mesoderm but expressed in heart late
CG6604	H15	cardiac mesoderm; heart
CG3578	bifid	brain; CNS; PNS
CG5133	Doc1	cardiac mesoderm; amnioserosa; ecto
CG5187	Doc2	cardiac mesoderm; amnioserosa; ecto
CG5093	Doc3	FC; cardiac mesoderm; amnioserosa
CG11202	org-1	FC; visceral mesoderm
CG7260	byn	no mesoderm; anal pad
CNS=central nervous system
PNS=peripheral nervous system
FC=founder cell

## Sheet: POUHD
Gene	Name	ISH Results
CG9151	acj6	pan-mesodermal early; PNS; VM
CG34395	nub	ectoderm; gut
CG12287	pdm2	hindgut; foregut; head; CNS; PNS; tracheal pits
CG10037	vvl	PNS; tracheal pits; hindgut
CG11641	pdm3	trachea
CNS=central nervous system
PNS=peripheral nervous system
VM=visceral mesoderm
